# Supplementary material for: Atomic-scale study of TiO2-GR nanohybrid formation by ALD: the effect of the gas phase precursor
Source: Royal Society of Chemistry journal article supplement (doi:10.1039/d3na00729d), 2023-01-01
Supplement: d3na00729d1.pdf [file d3na00729d1.pdf]

## Supplementary Information of the manuscript: Atomic-scale study of the TiO<sub>2</sub>-GR nanohybrid formation by ALD: The effect of the gas phase precursor

Jonathan E. Rodríguez Hueso<sup>1,2</sup>, H.A. Borbón-Nuñez<sup>2,3\*</sup>, R. Ponce-Pérez<sup>2</sup>, D.M. Hoat<sup>4,5</sup>, N. Takeuchi<sup>2</sup>, H. Tiznado, Jonathan Guerrero-Sánchez<sup>2\*</sup>

<sup>1</sup>*Centro de Investigación Científica y de Educación Superior de Ensenada, Carretera, Tijuana-Ensenada 3918, Apdo. Postal 22860, Ensenada, B.C., Mexico*

<sup>2</sup>*Centro de Nanociencias y Nanotecnología, Universidad Nacional Autónoma de México, km.107, Apdo. Postal 14. Carretera Tijuana-Ensenada, Ensenada, Baja California, México.*

<sup>3</sup>*CONACyT- Centro de Nanociencias y Nanotecnología, Universidad Nacional Autónoma de México, km.107, Apdo. Postal 14. Carretera Tijuana-Ensenada, Ensenada, Baja California, México.*

<sup>4</sup>*Institute of Theoretical and Applied Research, Duy Tan University, Ha Noi 100000, Viet Nam*

<sup>5</sup>*Faculty of Natural Sciences, Duy Tan University, Da Nang 550000, Viet Nam*

Corresponding authors: H.A.B-N ([hborbon@ens.cnyn.unam.mx](mailto:hborbon@ens.cnyn.unam.mx)), JGS ([guerrero@ens.cnyn.unam.mx](mailto:guerrero@ens.cnyn.unam.mx))

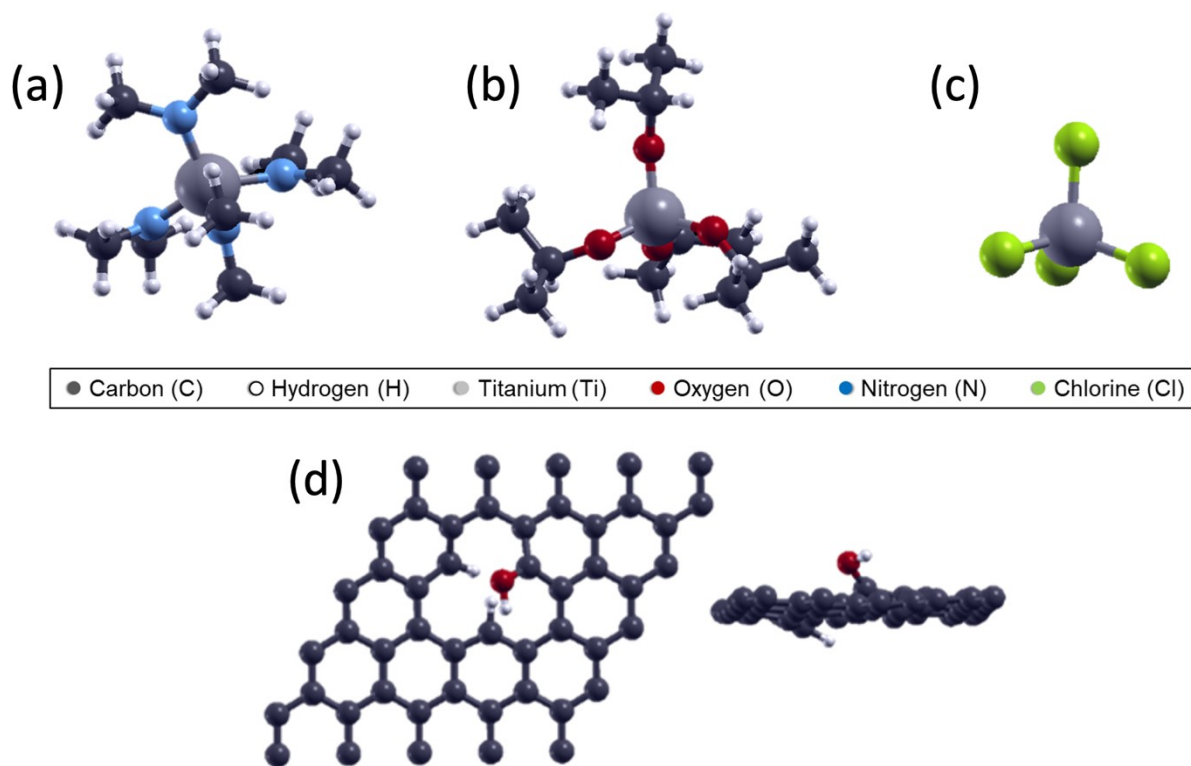

Figure S1. Optimized titanium precursors: a) TDMAT, b) TIP, and c) TTC. d) hydroxylated graphene model system.

|       |   |           |
|-------|---|-----------|
| TDMAT | → | 120-150°C |
| TIP   | → | 180-250°C |
| TTC   | → | 200-350°C |

**Figure S2.** ALD deposition temperatures in the  $\text{TiO}_2$  growth using TDMAT, TIP, and TTC.
